# Supplementary material
Source: PubMed Central journal article supplement (PMC6224637)
Supplement: mmc1.pdf [file mmc1.pdf]

**Biophysical Journal, Volume 115**

**Supplemental Information**

**Dynamic Migration Modes of Collective Cells**

**Shao-Zhen Lin, Sang Ye, Guang-Kui Xu, Bo Li, and Xi-Qiao Feng**

# Supporting Material for “Dynamic Migration Modes of Collective Cells”

Shao-Zhen Lin,<sup>1</sup> Sang Ye,<sup>1</sup> Guang-Kui Xu,<sup>2</sup> Bo Li,<sup>1</sup> and Xi-Qiao Feng<sup>1</sup>

<sup>1</sup>*Institute of Biomechanics and Medical Engineering, Applied Mechanics Laboratory,*

*Department of Engineering Mechanics, Tsinghua University, Beijing, China*

<sup>2</sup>*International Center for Applied Mechanics, State Key Laboratory for Strength and Vibration of Mechanical Structures, Xi'an Jiaotong University, Xi'an, China*

In this Supporting Material, we provide more details for derivation and numerical simulations. Additional data and figures are also included to support the results and conclusions given in the main text.

## 1. Normalization of the controlling equations

We integrate two typical intercellular social interactions — local alignment (LA) and contact inhibition of locomotion (CIL) into our active vertex model to investigate collective cell dynamics in a coherent cell monolayer. In the main text, we have given the controlling equation for the time evolution of vertices' positions,  $\mathbf{r}_i(t)$ , as

$$\frac{d\mathbf{r}_i}{dt} = \frac{1}{\gamma} \mathbf{f}_i^U + \sum_{J \in C_i} \frac{v_0 \mathbf{p}_J}{n_J} + \sum_{J \in C_i} \frac{\varepsilon_T \boldsymbol{\eta}_J^T(t)}{n_J}. \quad (\text{S1})$$

From the potential energy given by Eq. (1) in the main text, the potential force  $\mathbf{f}_i^U$  can be derived as

$$\mathbf{f}_i^U = - \sum_{J \in C_i} \frac{1}{2} K_a (A_J - A_0) [\mathbf{k} \times (\mathbf{r}_{j_2} - \mathbf{r}_{j_1})] - \sum_{J \in C_i} K_c L_J \left( \frac{\mathbf{r}_i - \mathbf{r}_{j_1}}{|\mathbf{r}_i - \mathbf{r}_{j_1}|} + \frac{\mathbf{r}_i - \mathbf{r}_{j_2}}{|\mathbf{r}_i - \mathbf{r}_{j_2}|} \right) - \sum_{j \in V_i} \Lambda \frac{\mathbf{r}_i - \mathbf{r}_j}{|\mathbf{r}_i - \mathbf{r}_j|}, \quad (\text{S2})$$

where  $\mathbf{k}$  denotes a unit vector normal to the cell monolayer; the summation  $\sum_{J \in C_i}$  computes over all cells  $C_i$  sharing vertex  $i$ , and  $j_1$  and  $j_2$  are the neighboring vertices of vertex  $i$  in cell  $J$ ; the summation  $\sum_{j \in V_i}$  is made over all neighboring vertices  $V_i$  of vertex  $i$ . Substituting (S2) into (S1), we obtain

$$\begin{aligned} \frac{d\mathbf{r}_i}{dt} = & - \frac{1}{\gamma} \sum_{J \in C_i} \frac{1}{2} K_a (A_J - A_0) [\mathbf{k} \times (\mathbf{r}_{j_2} - \mathbf{r}_{j_1})] - \frac{1}{\gamma} \sum_{J \in C_i} K_c L_J \left( \frac{\mathbf{r}_i - \mathbf{r}_{j_1}}{|\mathbf{r}_i - \mathbf{r}_{j_1}|} + \frac{\mathbf{r}_i - \mathbf{r}_{j_2}}{|\mathbf{r}_i - \mathbf{r}_{j_2}|} \right) \\ & - \frac{1}{\gamma} \sum_{j \in V_i} \Lambda \frac{\mathbf{r}_i - \mathbf{r}_j}{|\mathbf{r}_i - \mathbf{r}_j|} + \sum_{J \in C_i} \frac{v_0 \mathbf{p}_J}{n_J} + \sum_{J \in C_i} \frac{\varepsilon_T \boldsymbol{\eta}_J^T(t)}{n_J}. \end{aligned} \quad (\text{S3})$$

Besides, the cell polarity  $\mathbf{p}_J = (\cos \theta_J, \sin \theta_J)$  is mediated by LA and CIL, and evolves as

$$\frac{d\theta_J}{dt} = \frac{\mu_a}{n_J} \sum_{K \in C_J} \sin(\theta_K^{(\text{vel})} - \theta_J) + \frac{\mu_c}{n_J} \sum_{K \in C_J} \sin(\alpha_{J,K} - \theta_J) + \varepsilon_R \eta_J^R(t). \quad (\text{S4})$$

We normalize the governing equations for the vertices' positions (i.e. (S3)) and the polarity directions of cells (i.e. (S4)) through the length scale  $l = \sqrt{A_0}$  and the time scale  $\tau = \gamma / (K_a A_0)$ . The normalized equations can be written as

$$\begin{aligned} \frac{d\tilde{\mathbf{r}}_i}{d\tilde{t}} = & - \sum_{J \in C_i} \frac{1}{2} (\tilde{A}_J - 1) [\mathbf{k} \times (\tilde{\mathbf{r}}_{j_2} - \tilde{\mathbf{r}}_{j_1})] - \sum_{J \in C_i} \tilde{K}_c \tilde{L}_J \left( \frac{\tilde{\mathbf{r}}_i - \tilde{\mathbf{r}}_{j_1}}{|\tilde{\mathbf{r}}_i - \tilde{\mathbf{r}}_{j_1}|} + \frac{\tilde{\mathbf{r}}_i - \tilde{\mathbf{r}}_{j_2}}{|\tilde{\mathbf{r}}_i - \tilde{\mathbf{r}}_{j_2}|} \right) \\ & - \sum_{j \in V_i} \tilde{\Lambda} \frac{\tilde{\mathbf{r}}_i - \tilde{\mathbf{r}}_j}{|\tilde{\mathbf{r}}_i - \tilde{\mathbf{r}}_j|} + \sum_{J \in C_i} \frac{\tilde{v}_0 \mathbf{p}_J}{n_J} + \sum_{J \in C_i} \frac{\tilde{\varepsilon}_T \tilde{\boldsymbol{\eta}}_J^T(\tilde{t})}{n_J} \end{aligned} \quad (\text{S5})$$

and

$$\frac{d\theta_J}{d\tilde{t}} = \frac{\tilde{\mu}_a}{n_J} \sum_{K \in C_J} \sin(\theta_K^{(\text{vel})} - \theta_J) + \frac{\tilde{\mu}_c}{n_J} \sum_{K \in C_J} \sin(\alpha_{J,K} - \theta_J) + \tilde{\varepsilon}_R \tilde{\eta}_J^R(\tilde{t}), \quad (\text{S6})$$

where the dimensionless parameters are defined as

$$\begin{aligned}\tilde{\mathbf{r}}_i &= \frac{\mathbf{r}_i}{\sqrt{A_0}}, \quad \tilde{t} = \frac{t}{\tau}, \quad \tilde{A}_J = \frac{A_J}{A_0}, \quad \tilde{L}_J = \frac{L_J}{\sqrt{A_0}}, \\ \tilde{K}_c &= \frac{K_c}{K_a A_0}, \quad \tilde{\Lambda} = \frac{\Lambda}{K_a A_0^{3/2}}, \quad \tilde{v}_0 = \frac{v_0 \tau}{\sqrt{A_0}}, \quad \tilde{\mu}_a = \mu_a \tau, \quad \tilde{\mu}_c = \mu_c \tau, \\ \tilde{\varepsilon}_T &= \frac{\varepsilon_T \sqrt{\tau}}{\sqrt{A_0}}, \quad \tilde{\eta}_J^T = \eta_J^T \sqrt{\tau}, \quad \tilde{\varepsilon}_R = \varepsilon_R \sqrt{\tau}, \quad \tilde{\eta}_J^R = \eta_J^R \sqrt{\tau}.\end{aligned}\tag{S7}$$

## 2. Estimation of the dimensionless parameters

According to experimental measurements (1), the viscosity of biological tissues is in the order of  $10^4 - 10^5 \text{ N} \cdot \text{s} \cdot \text{m}^{-2}$ , leading to an estimation of the friction coefficient  $\gamma \sim 0.01 - 0.1 \text{ N} \cdot \text{s} \cdot \text{m}^{-1}$ . Taking the cell areal stiffness  $K_a \sim 10^5 - 10^7 \text{ N} \cdot \text{m}^{-3}$  for epithelial tissues (2, 3), and the reference area  $A_0 = 900 \mu\text{m}^2$ , we have the estimation of the length scale and the time scale used for normalization as  $l = \sqrt{A_0} \sim 30 \mu\text{m}$  and  $\tau = \gamma / (K_a A_0) \sim 100 \text{ s}$ , respectively. The cell contraction force is in the range of  $1 - 10 \text{ nN}$  for epithelial cell sheets (4), corresponding to the cell contraction modulus  $K_c \sim 10^{-5} - 10^{-4} \text{ N} \cdot \text{m}^{-1}$ . The intercellular tension is of the order  $\Lambda \sim 10^{-9} - 10^{-8} \text{ N}$ , as estimated from experimental measurements on biological tissues (1). Therefore, we have the estimation of dimensionless cell contractile modulus  $\tilde{K}_c = K_c / (K_a A_0) \sim 0.01 - 0.1$  and the dimensionless intercellular tension  $\tilde{\Lambda} = \Lambda / (K_a A_0^{3/2}) \sim 0.01 - 0.1$ . Besides, the cell protrusive force is of the order  $1 \text{ nN}$  (5), resulting in a self-propelled velocity  $v_0 \sim 10^{-8} - 10^{-7} \text{ m} \cdot \text{s}^{-1}$ , with its dimensionless form of the order  $\tilde{v}_0 = v_0 \tau / \sqrt{A_0} \sim 0.01 - 0.1$ . Consequently, we use the following values for the dimensionless parameters in our study:  $\tilde{K}_c = 0.02$ ,  $\tilde{\Lambda} = 0.1$ ,  $\tilde{v}_0 = 0.1$ . Besides, the intensities of LA and CIL (in their dimensionless forms) are assumed to be of the order  $\tilde{\mu}_a = 0.1$  and  $\tilde{\mu}_c = 1.0$ , respectively. Moreover, to focus on the roles of LA and CIL in regulating collective cell dynamics in a confluent cell monolayer, we set the noises  $\varepsilon_T = 0$  and  $\varepsilon_R = 0$  for simplicity.

## References

1. Forgacs, G., Foty, R. A., Shafirir, Y. & Steinberg, M. S. Viscoelastic properties of living embryonic tissues: a quantitative study. *Biophys. J.* **74**, 2227–2234 (1998).
2. Girard, P. P., Cavalcanti-Adam, E. A., Kemkemer, R. & Spatz, J. P. Cellular chemomechanics at interfaces: sensing, integration and response. *Soft Matter* **3**, 307–326 (2007).
3. Solon, J., Kaya-Copur, A., Colombelli, J. & Brunner, D. Pulsed forces timed by a ratchet-like mechanism drive directed tissue movement during dorsal closure. *Cell* **137**, 1331–1342 (2009).
4. Hannezo, E., Prost, J. & Joanny, J. F. Theory of epithelial sheet morphology in three dimensions. *Proc. Natl. Acad. Sci. USA* **111**, 27–32 (2014).
5. Cochet-Escartin, O., Ranft, J., Silberzan, P. & Marcq, P. Border forces and friction control epithelial closure dynamics. *Biophys. J.* **106**, 6573 (2014).

Supplemental figures

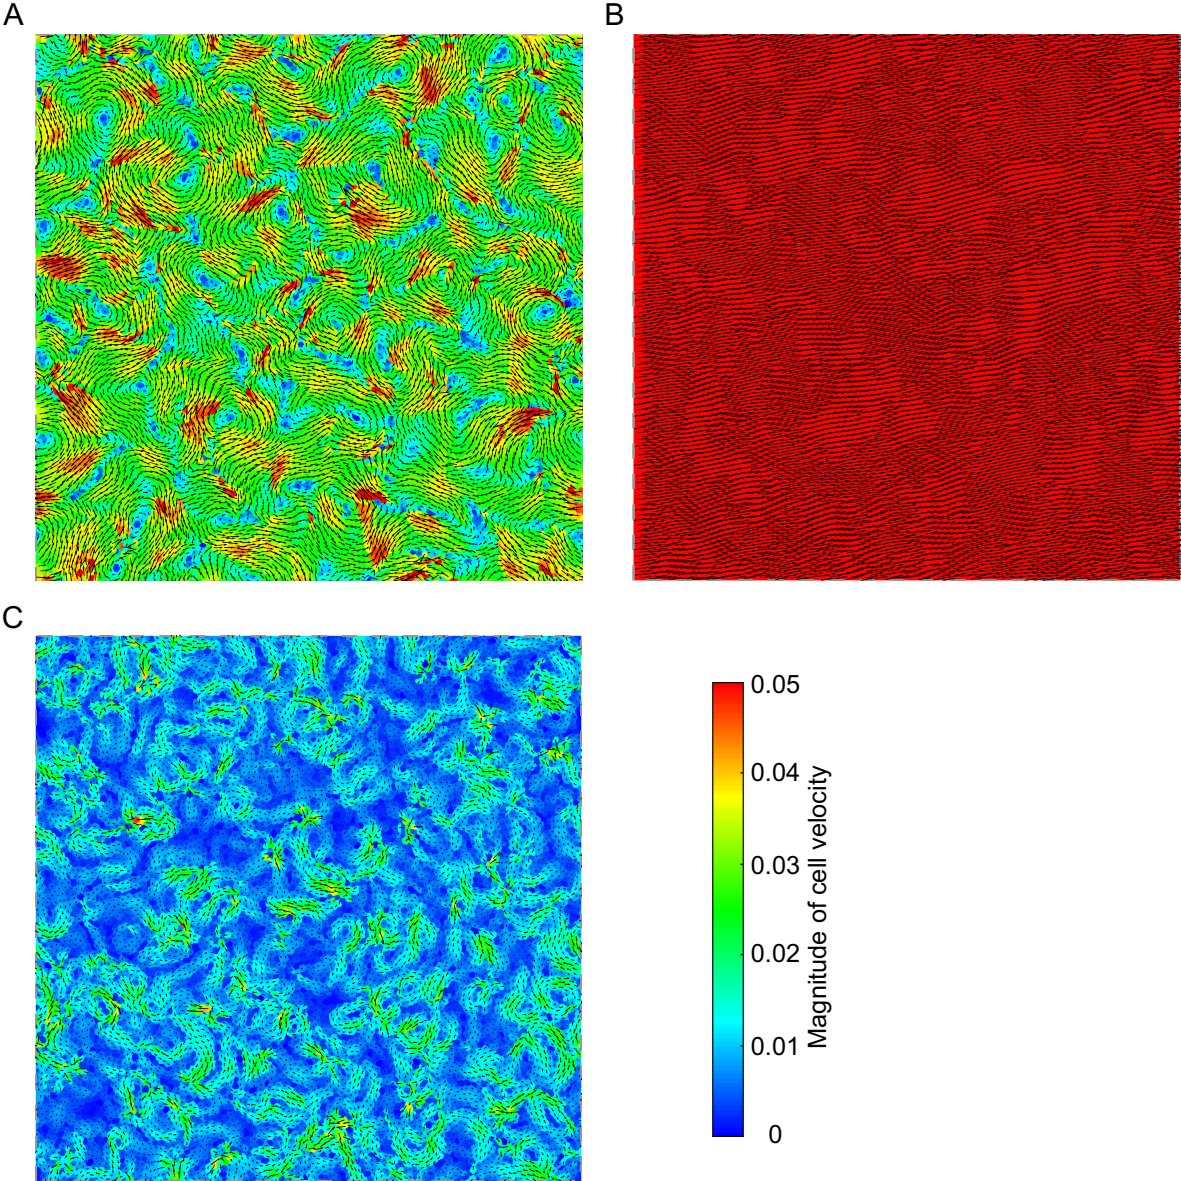

**Fig. S1. Typical velocity fields of collective cell migration obtained from our active vertex model.** The arrows denote velocity vectors of cells and the color code indicates magnitude of cell velocity. Parameters values: (A)  $\mu_a = 0.05$  and  $\mu_c = 1.0$ ; (B)  $\mu_a = 0.1$  and  $\mu_c = 0$ ; and (C)  $\mu_a = 0.0$  and  $\mu_c = 1.0$ .

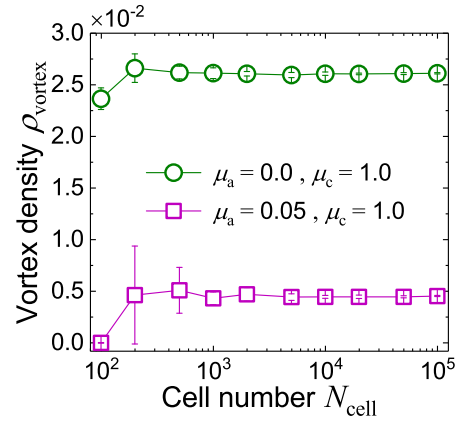

**Fig. S2. Intrinsic vortex density in confluent cell monolayers.** The vortex density  $\rho_{\text{vortex}}$  approaches a constant for large enough system ( $N_{\text{cell}} \rightarrow +\infty$ ). Data are mean  $\pm$  SD.

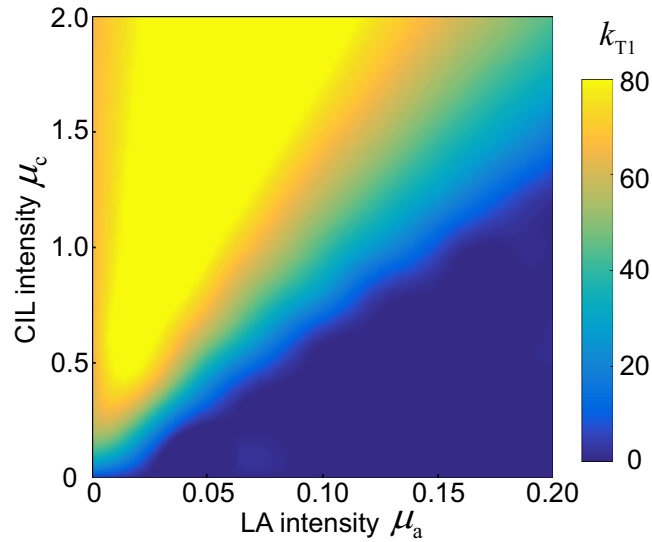

**Fig. S3. The frequency of cell neighbor exchange regulated by intercellular social interactions.** Phase diagrams of the frequency of cell neighbor exchange  $k_{\text{T1}}$  under the regulation of LA ( $\mu_a$ ) and CIL ( $\mu_c$ ).

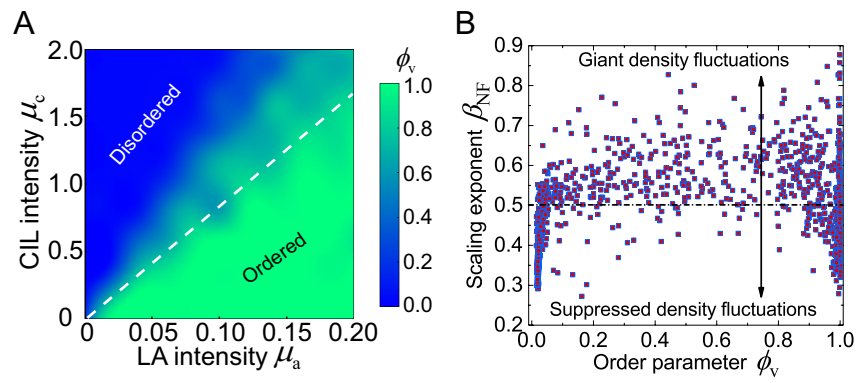

**Fig. S4. Giant density fluctuations in confluent cell monolayers are not restricted to emerge in the highly ordered state of collective motions, but take place in a state with the motion order in a rather broad range.** (A) Phase diagrams of the order parameter  $\phi_v$  regulated by LA ( $\mu_a$ ) and CIL ( $\mu_c$ ). Here, the order parameter is defined as  $\phi_v = \langle |(1/N_{\text{cell}}) \sum_J \mathbf{v}_J / |\mathbf{v}_J| | \rangle_t$ . The ordered phase and disordered phase are distinguished at  $\phi_v = 0.8$ . (B) Scatter diagram of the scaling exponent for number fluctuations  $\beta_{NF}$  versus the motion order  $\phi_v$ .
