# Supplementary material
Source: PubMed Central journal article supplement (PMC6224637)
Supplement: mmc2.pdf [file mmc2.pdf]

# Dynamic Migration Modes of Collective Cells

Shao-Zhen Lin,<sup>1</sup> Sang Ye,<sup>1</sup> Guang-Kui Xu,<sup>2</sup> Bo Li,<sup>1,\*</sup> and Xi-Qiao Feng<sup>1,\*</sup>

<sup>1</sup>Institute of Biomechanics and Medical Engineering, Applied Mechanics Laboratory, Department of Engineering Mechanics, Tsinghua University, Beijing, China and <sup>2</sup>International Center for Applied Mechanics, State Key Laboratory for Strength and Vibration of Mechanical Structures, Xi'an Jiaotong University, Xi'an, China

**ABSTRACT** Collective cell migration occurs in a diversity of physiological processes such as wound healing, cancer metastasis, and embryonic morphogenesis. In the collective context, cohesive cells may move as a translational solid, swirl as a fluid, or even rotate like a disk, with scales ranging from several to dozens of cells. In this work, an active vertex model is presented to explore the regulatory roles of social interactions of neighboring cells and environmental confinements in collective cell migration in a confluent monolayer. It is found that the competition between two kinds of intercellular social interactions—local alignment and contact inhibition of locomotion—drives the cells to self-organize into various dynamic coherent structures with a spatial correlation scale. The interplay between this intrinsic length scale and the external confinement dictates the migration modes of collective cells confined in a finite space. We also show that the local alignment–contact inhibition of locomotion coordination can induce giant density fluctuations in a confluent cell monolayer without gaps, which triggers the spontaneous breaking of orientational symmetry and leads to phase separation.

## INTRODUCTION

Collective cell migration occurs in diverse physiological processes ranging from wound healing to embryogenesis and is also a hallmark of pathological processes such as cancer metastasis (1–3). For example, most solid tumors feature predominantly collective invasion during metastasis, in which cancer cells invade the peritumoral stroma while maintaining cell-cell contacts (1). Early *Drosophila* embryos undergo extensive collective cell motions to form and shape tissues and organs, as observed in gastrulation, dorsal closure, and border cell migration (4–6). In these physiological and pathological processes, collective cells migrate with different dynamic structures, e.g., clusters, strands, and sheets.

The motility of cells stems from the activity of cell protrusions (e.g., filopodia and lamellipodia), which form at the leading edge of cells, adhere to substrates and extend forward, and generate forces to propel cell migration (7). Dynamic motility enables cell assemblies to self-organize into various dynamic patterns, e.g., directed motion, swirling, and rotation (8–13), akin to those in other biological systems such as bacterial suspensions, insect swarms, and animal groups (14–16). Among others, the swirling of collective cells, also referred to as active turbulence, has been observed in many epithelial systems, with a spatial correlation scale spanning from several to

dozens of cells (8–10,17). For instance, we observed the swirling pattern in Madin-Darby canine kidney (MDCK) cell monolayers (Fig. 1 A) and human umbilical vein endothelial cell (HUVEC) monolayers (Fig. 1 B), with spatial correlation lengths of 10–15 cells. In addition, migratory cell cohorts may interact with other nonmotile cells or surrounding confinements. These external constraints also influence the epithelial dynamics (13,18–21). For example, unconfined epithelia tend to undergo local swirling, whereas those confined in a circular domain may exhibit persistent global rotation (11–13,19,20). The dynamics of collective cells is not only critical for the formation of acini and ducts in glandular tissue, tissue polarity, and tubulogenesis (4,6,22) but also may provide a novel criterion for the diagnosis of such diseases as papillary thyroid carcinoma (23). However, it remains obscure why these mysterious, either solid- or fluid-like, coherent structures emerge and how intercellular interactions and extrinsic cues affect these migration modes.

Here, we establish an active vertex model accounting for both active cell motility and intercellular social interactions to gain physical insights into the self-organized dynamic structures of collective migratory cells. In such biological systems as insects and fishes, social interactions of individuals are important for their collective behavior. Somewhat similarly, local alignment (LA) and contact inhibition of locomotion (CIL) are two key types of social interactions in many cell lines. The former tends to drive neighboring cells to move along the same direction (24,25), whereas

Submitted June 20, 2018, and accepted for publication September 13, 2018.

\*Correspondence: libome@tsinghua.edu.cn or fengxq@tsinghua.edu.cn

Editor: Sean Sun.

<https://doi.org/10.1016/j.bpj.2018.09.010>

© 2018 Biophysical Society.

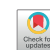

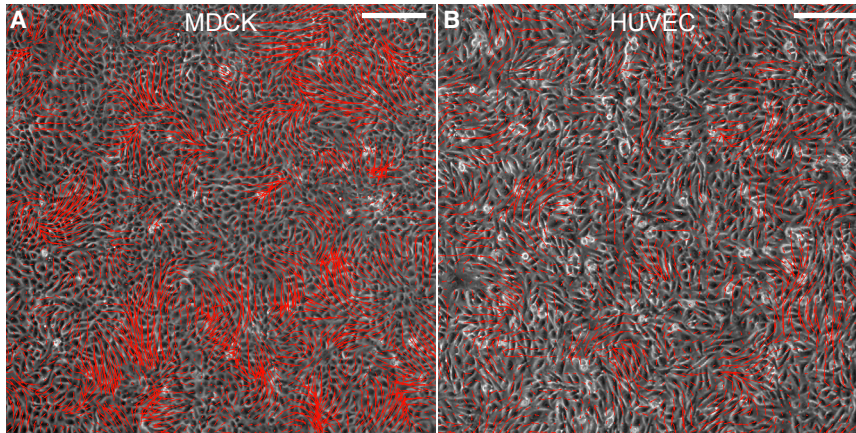

FIGURE 1 Experimentally measured velocity fields of collective cell migration in confluent monolayers. A swirling pattern was observed in (A) an MDCK cell monolayer and (B) an HUVEC monolayer. Red arrows show the velocity vectors obtained via PIV analysis. Scale bars, 200  $\mu\text{m}$ . To see this figure in color, go online.

the latter produces a repulsive force among the cells upon contact (26,27). From a biochemical perspective, LA is probably related to the planar cell-polarity signaling cascade (25), whereas CIL results from molecular interactions such as cadherin-mediated cell-cell adhesion (27). In this article, we use the active vertex model to decode the combined biophysical mechanisms of LA and CIL in collective cell motions. We reveal that the competition between LA and CIL can lead to rich spatiotemporal patterns with an intrinsic length scale spanning multiple cells and even induces giant density fluctuations. In addition, boundary confinements also significantly regulate the collective migratory patterns for cells in a confined regime, echoing diverse experimental observations (11,13,18,19).

## MATERIALS AND METHODS

### Experiments

MDCK strain II cells were cultured in Dulbecco's modified Eagle's medium supplemented with 10% fetal bovine serum (Gibco, Billings, MT), 100  $\mu\text{g}/\text{mL}$  penicillin, and 100  $\mu\text{g}/\text{mL}$  streptomycin. HUVECs were cultured in Dulbecco's modified Eagle's medium/F12 (Gibco) supplemented with 10% fetal bovine serum (Gibco), 100  $\mu\text{g}/\text{mL}$  penicillin, and 100  $\mu\text{g}/\text{mL}$  streptomycin. Both MDCK cells and HUVECs were maintained at 37°C in a humidified atmosphere with 5%  $\text{CO}_2$ . Confluent cell monolayers were allowed to develop on petri dishes (Falcon, Austin, TX) for enough time (typically  $\sim 1$  day) before live-cell imaging. Phase contrast images were acquired with a  $\times 10$  objective, using an Olympus IX83 inverted fluorescence microscope (Olympus, Tokyo, Japan). Two successive images of the same field were taken at a time interval of 1 min.

The velocity field in a confluent cell monolayer was computed from the phase contrast time-lapse images via particle image velocimetry (PIV). In PIV analysis, the interrogation window size was set as  $48 \times 48$  pixels with an overlap of 50%. Outliers of the calculated velocity vectors were abolished and replaced by fitting values based on the neighboring velocity vectors. Custom-made PIV software was written in MATLAB (The MathWorks, Natick, MA).

### Biophysical model

We describe a confluent epithelial monolayer as an interacting polygonal tiling of space in which each cell is modeled as a polygon with an active

motile force. The potential energy of the system stems from cell area elasticity, cell contractility, and intercellular tension. It is written as (28–32)

$$U = \sum_J \frac{1}{2} K_a (A_J - A_0)^2 + \sum_J \frac{1}{2} K_c L_J^2 + \sum_{(i,j)} \Lambda l_{ij}, \quad (1)$$

where  $K_a$  denotes the area stiffness of a cell,  $A_0$  refers to the reference area, and  $A_J$  is the current area of the  $J$ -th cell;  $K_c$  represents the contractile modulus of a cell, and  $L_J$  is the perimeter of the  $J$ -th cell;  $\Lambda$  quantifies the interfacial tension between neighboring cells, and  $l_{ij}$  is the edge length of the cell-cell interface  $ij$  connecting vertices  $i$  and  $j$ . It is noted that the cell contractile modulus,  $K_c$ , could also be time-dependent and regulated by biochemical cues such as the  $\rho$ -ROCK signaling pathway (31,33). For the sake of simplicity, however, we take a constant value of  $K_c$  in the following analysis.

The cellular dynamics is determined by the evolution of vertex positions,  $\mathbf{r}_i(t)$ , with  $i$  being the index of vertices. Considering the force balance at vertex  $i$ , the spatiotemporal dynamic evolution of vertices is controlled by

$$\frac{d\mathbf{r}_i}{dt} = \frac{1}{\gamma} \mathbf{f}_i^U + \sum_{J \in C_i} \frac{v_0 \mathbf{p}_J}{n_J} + \sum_{J \in C_i} \frac{\varepsilon_T \boldsymbol{\eta}_J^T(t)}{n_J}, \quad (2)$$

where  $\gamma$  is the friction coefficient, and  $\mathbf{f}_i^U = -\partial U / \partial \mathbf{r}_i$  stands for the potential force acting on the vertex  $i$ ;  $v_0$  denotes the self-propelled velocity, and  $\mathbf{p}_J = (\cos \theta_J, \sin \theta_J)$  represents the polarity vector with  $\theta_J$  being its direction;  $\varepsilon_T$  is the strength of translational noises and  $\boldsymbol{\eta}_J^T(t)$  are independent unit-variance Gaussian white noise vectors;  $n_J$  refers to the number of neighboring cells of cell  $J$ , and  $\sum_{J \in C_i}$  computes a summation over all neighboring cells  $C_i$  of vertex  $i$ .

In the literature, several models have been proposed to describe cell polarity (12,20,24–26,33–40). For example, Koride et al. (33) considered the memory effect of cells and assumed that the cell polarity  $\mathbf{p}_J$  depends on their movement history. We here consider the effect of two competing intercellular social interactions—LA and CIL—on cell polarity. Specifically, LA tends to align the cell polarity  $\mathbf{p}_J$  along the motion direction of its neighbors, whereas CIL tends to orient the cell polarity  $\mathbf{p}_J$  in the direction away from its neighbors, as illustrated in Fig. 2 A. Accordingly, the polarity direction  $\theta_J$  evolves as

$$\frac{d\theta_J}{dt} = g_{\text{LA}}(\mathbf{p}_J; \mathbf{v}_K) + g_{\text{CIL}}(\mathbf{p}_J; \mathbf{r}_K) + \varepsilon_R \eta_J^R(t), \quad (3)$$

where  $g_{\text{LA}}(\mathbf{p}_J; \mathbf{v}_K)$  and  $g_{\text{CIL}}(\mathbf{p}_J; \mathbf{r}_K)$  characterize the effects of LA and CIL, respectively, with  $\mathbf{r}_K$  being the geometric center of cell  $K$  and  $\mathbf{v}_K = d\mathbf{r}_K/dt$  being the corresponding velocity vector;  $\varepsilon_R$  denotes the strength of

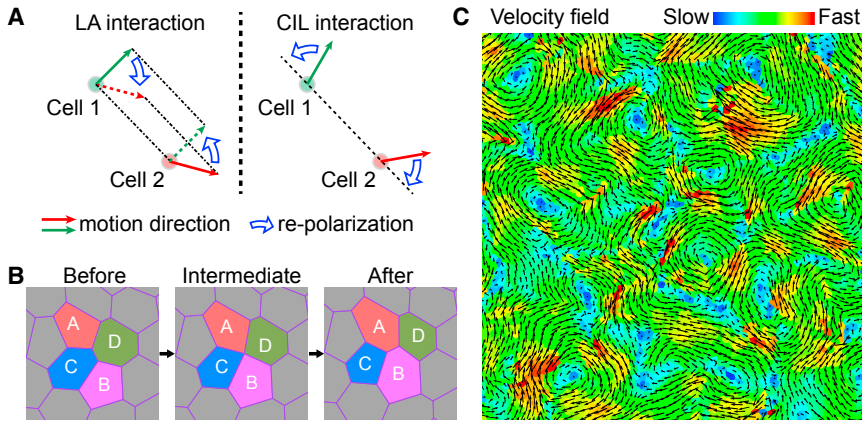

FIGURE 2 Active vertex model accounting for intercellular social interactions. (A) A schematic of the LA and CIL interactions among cells. (B) A schematic of T1 topological transition in the active vertex model. (C) The swirling pattern obtained from our active vertex model. The black arrows denote the velocity vectors, and the color code corresponds to its magnitude. Shown here is a local window of the velocity field for a system containing  $N \sim 10,000$  cells (see Fig. S1 A for the global view). Parameter values:  $\mu_a = 0.05$  and  $\mu_c = 1.0$ . To see this figure in color, go online.

rotational noise, and  $\eta_J^R(t)$  are independent unit-variance Gaussian white noises. Inspired by previous studies (26,40–42), we express  $g_{LA}(\mathbf{p}_J; \mathbf{v}_K)$  and  $g_{CIL}(\mathbf{p}_J; \mathbf{r}_K)$  as

$$g_{LA}(\mathbf{p}_J; \mathbf{v}_K) = \frac{\mu_a}{n_J} \sum_{K \in C_J} \sin[\theta_K^{(vel)} - \theta_J],$$

$$g_{CIL}(\mathbf{p}_J; \mathbf{r}_K) = \frac{\mu_c}{n_J} \sum_{K \in C_J} \sin(\alpha_{J,K} - \theta_J),$$
(4)

where the parameters  $\mu_a$  and  $\mu_c$  stand for the intensities of LA and CIL, respectively;  $\theta_K^{(vel)} = \arg(\mathbf{v}_K)$  is the velocity direction of cell  $K$ ;  $\alpha_{J,K} = \arg(\mathbf{r}_J - \mathbf{r}_K)$  denotes the argument of the direction pointing from cell  $K$  to cell  $J$ , and  $C_J$  is the collection of neighboring cells of cell  $J$ . Both LA and CIL have been reported across diverse cell lines. It has been thought that LA results from planar cell polarity associated with the dynamic cytoskeleton network (25), whereas CIL arises from cell-cell interactions such as cadherin-mediated intercellular adhesion (27). To date, however, it is still difficult to quantitatively evaluate the intensities of LA and CIL. Here, we omit the biochemical details of LA and CIL.

It should be noted that although both CIL and noises tend to break the alignment of collective cell motions, their mechanisms are quite different and would lead to distinct migratory modes. For instance, at the free boundary of a cell monolayer, CIL renders boundary cells to polarize toward the free space, whereas noises favor a random cell movement without direction biases.

Equations 1, 2, 3, and 4 control the cellular motions in a confluent cell monolayer. For the sake of generality, we normalize these equations via

the length scale  $\ell = \sqrt{A_0} \sim 30 \mu\text{m}$  and the timescale  $\tau = \gamma/(K_a A_0) \sim 100 \text{ s}$  (Supporting Materials and Methods; Table 1). In our analysis, we take the dimensionless parameters as  $K_c = 0.02$ ,  $\Lambda = 0.1$ , and  $v_0 = 0.1$ , as estimated from experiments (Table 1).  $\mu_a$  and  $\mu_c$  are set in the range 0.1–1.0. To focus on the roles of LA and CIL, we ignore the noises and thus set  $\epsilon_T = 0$  and  $\epsilon_R = 0$ . Besides, T1 topological transition (Fig. 2 B), which accounts for cell neighbor exchange (28–30), is involved in our simulations. We perform T1 topological transitions once any cell-cell interface is shorter than a threshold  $\Delta_{T1}$  (taken as  $2.5\Lambda/(K_a A_0)$  here (28)) and accept it only if the potential energy of the post-transition configuration is lower than that of the pre-transition configuration (30). The key parameters and their dimensionless forms and values used in our simulations are summarized in Table 1.

All simulations were performed in MATLAB. The time step was set to be  $\Delta t = 0.1$ , and the total running step was typically  $N_s = 60,000$ . Data was collected for analysis after the system had arrived at a dynamic steady state (typically after  $N_d = 20,000$  running steps). For statistics, 10 independent simulations were performed for each set of parameter values.

## RESULTS

### Intrinsic modes and spatial correlation scale

We first explore the intrinsic modes of collective cell motions in the monolayer. To eliminate the effect of boundary constraint, we here adopt the periodic boundary conditions, with  $N_{\text{cell}} \sim 10,000$  cells in a periodic regime  $L \times L$  and a

TABLE 1 Key Parameters Used in Our Simulations

| Physical meaning              | Symbol    | Value                                                           | Reference                 | Normalization             |            |
|-------------------------------|-----------|-----------------------------------------------------------------|---------------------------|---------------------------|------------|
|                               |           |                                                                 |                           | Formula                   | Value      |
| Cell area stiffness           | $K_a$     | $10^5\text{--}10^7 \text{ N} \cdot \text{m}^{-3}$               | (5,60)                    | ND                        | ND         |
| Cell reference area           | $A_0$     | $900 \mu\text{m}^2$                                             | Assumed                   | ND                        | ND         |
| Cell contractile modulus      | $K_c$     | $10^{-5}\text{--}10^{-4} \text{ N} \cdot \text{m}^{-1}$         | (61)                      | $K_c/(K_a A_0)$           | 0.01–0.1   |
| Cell-cell interfacial tension | $\Lambda$ | $10^{-9}\text{--}10^{-8} \text{ N}$                             | (62)                      | $\Lambda/(K_a A_0^{3/2})$ | 0.01–0.1   |
| Friction coefficient          | $\gamma$  | $0.01\text{--}0.1 \text{ N} \cdot \text{s} \cdot \text{m}^{-1}$ | (62)                      | ND                        | ND         |
| Length scale                  | $\ell$    | $30 \mu\text{m}$                                                | $\ell = \sqrt{A_0}$       | ND                        | ND         |
| Time scale                    | $\tau$    | $100 \text{ s}$                                                 | $\tau = \gamma/(K_a A_0)$ | ND                        | ND         |
| Self-propelled velocity       | $v_0$     | $10^{-8} \sim 10^{-7} \text{ m} \cdot \text{s}^{-1}$            | (63)                      | $v_0 \tau / \sqrt{A_0}$   | 0.01–0.1   |
| LA intensity                  | $\mu_a$   | $\sim 10^{-4} \text{ s}^{-1}$                                   | Assumed                   | $\mu_a \tau$              | $\sim 0.1$ |
| CIL intensity                 | $\mu_c$   | $\sim 10^{-3} \text{ s}^{-1}$                                   | Assumed                   | $\mu_c \tau$              | $\sim 1.0$ |

ND, no data.

fixed cell areal density  $\rho_{\text{cell}} = N_{\text{cell}}A_0/L^2 \equiv 1.0$ . Thus, the simulated regime has a size  $L \sim 100$  times the average cell size, much larger than the spatial correlation scale of collective cell motions observed in our experiments and previously reported ( $\sim 10$ – $20$  cell size). We find that under the coordination of LA and CIL, the initially randomly polarized cells can spontaneously orchestrate into a dynamic swirling pattern (Figs. 2 C and S1 A), with the mean motion speed around  $0.2v_0 \sim 21 \mu\text{m/h}$ , in agreement with our experiments ( $16$ – $22 \mu\text{m/h}$  for MDCK cell monolayers and  $10$ – $14 \mu\text{m/h}$  for HUVEC monolayers). Our simulations can capture the predominant features including migration mode and patterns of collective cell migration, as observed in our experiments on MDCK cell monolayers and HUVEC monolayers (Fig. 1) and previous experiments with other cell lines (8,10,18).

To identify how LA and CIL mediate collective cell motions, we first distinguish two typical migratory modes: 1) translational motions, in which cells in the monolayer move coherently and synchronously as a solid; and 2) “cage relative” motions, in which intercellular relative movements are dominant in the collective motions. To physically disentangle the translational and the “cage relative” motions, we examine the mean square displacement (MSD)  $\langle r^2(\Delta t) \rangle = \langle |\mathbf{u}_J(t, \Delta t)|^2 \rangle_{J,t}$  and the “cage relative” mean square displacement (CR-MSD)  $\langle r^2(\Delta t) \rangle^{\text{CR}} = \langle |\mathbf{u}_J^{\text{CR}}(t, \Delta t)|^2 \rangle_{J,t}$ , where  $\mathbf{u}_J(t, \Delta t) = \mathbf{u}_J(t + \Delta t) - \mathbf{u}_J(t)$  and  $\mathbf{u}_J^{\text{CR}}(t, \Delta t) = \mathbf{u}_J(t, \Delta t) - \mathbf{u}_J^{\text{cage}}(t, \Delta t)$  are

the total displacement and the “cage relative” displacement of cell  $J$  during the time interval  $t \rightarrow t + \Delta t$ , respectively. Here,  $\mathbf{u}_J^{\text{cage}}(t, \Delta t)$  is the displacement of the instantaneous “local cage” of cell  $J$  and is defined as  $\mathbf{u}_J^{\text{cage}}(t, \Delta t) = (1/n_J) \sum_{K \in C_J} \mathbf{u}_K(t, \Delta t)$ . Based on the MSD and the CR-MSD, we introduce a dimensionless parameter  $\varphi_D = \lim_{\Delta t \rightarrow \infty} [\langle r^2(\Delta t) \rangle^{\text{CR}} / \langle r^2(\Delta t) \rangle]$  to quantify the fraction of “cage relative” cellular motions. It is found that  $\varphi_D$  is small for strong LA and weak CIL (Fig. 3 A), exhibiting a motion mode akin to “solid-like” rigid translation (Fig. S1 B), in which the monolayer moves synchronously and directionally with few cell rearrangements, entering a “solid-like jammed” phase. For strong CIL and weak LA,  $\varphi_D$  is close to 1 (Fig. 3 A), which indicates that the monolayer tends to attain a fluid-like unjammed state in which the “cage relative” cellular motions are predominant (Fig. S1 C). Taken together, our results reveal that LA tends to suppress whereas CIL promotes intercellular relative motions. The trade-off between LA and CIL may determine the transition of collective cellular motion modes.

To characterize the swirling intensity, we count the number of vortex cores  $N_{\text{vortex}}$  based on the angle the velocity field rotates in one loop that runs through all the instantaneous neighbors of a cell (43). The vortex density is then defined as  $\rho_{\text{vortex}} = N_{\text{vortex}}A_0/L^2$ . We vary the system size to examine the dependence of vortex density  $\rho_{\text{vortex}}$  on cell population  $N_{\text{cell}}$ . It is found that the vortex density  $\rho_{\text{vortex}}$  approaches a constant value for a sufficiently large system

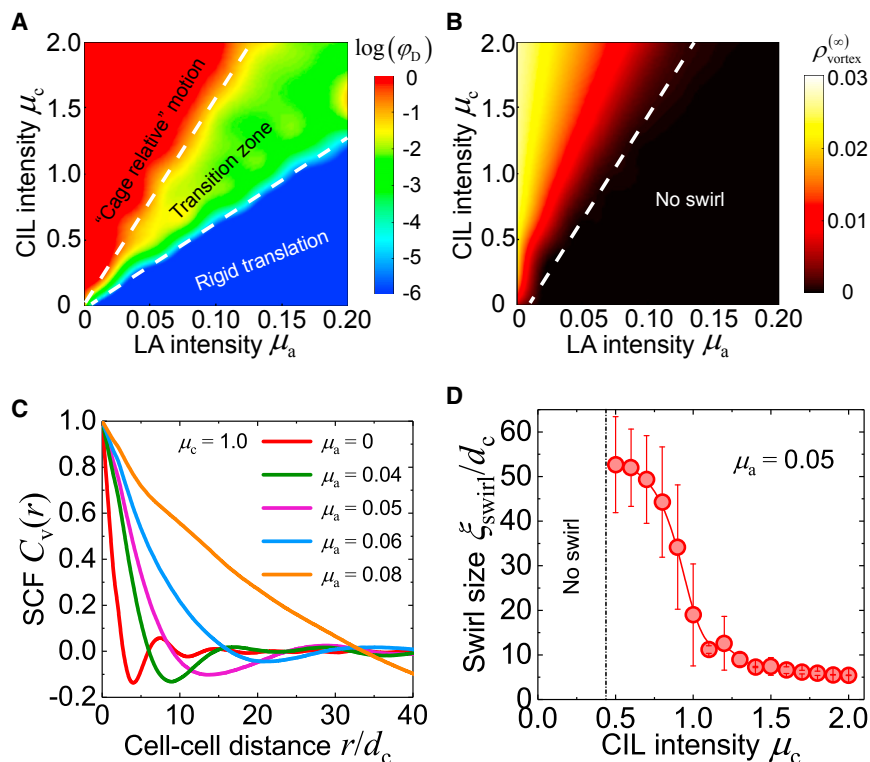

FIGURE 3 Intrinsic modes and spatial correlation of collective cell migration. Phase diagrams of (A) the fraction of “cage relative” motions  $\varphi_D$  and (B) the intrinsic vortex density  $\rho_{\text{vortex}}^{(\infty)}$  modulated by the intensities of LA ( $\mu_a$ ) and CIL ( $\mu_c$ ). In (A), the “cage relative” motion and rigid translation modes are defined for  $\log(\varphi_D) > -1$  and  $\log(\varphi_D) < -5$ , respectively. In (B), the intrinsic vortex density  $\rho_{\text{vortex}}^{(\infty)}$  is calculated in a system containing  $\sim 10,000$  cells. (C) The spatial correlation function (SCF)  $C_v(r)$  of cell velocity under different intensities of LA  $\mu_a$ , where  $d_c$  is the mean distance between neighboring cells, is shown. (D) The swirl size  $\xi_{\text{swirl}}$  versus the CIL intensity  $\mu_c$  is shown. Data are mean  $\pm$  SD. To see this figure in color, go online.

(Fig. S2), suggesting that an intrinsic vortex density  $\rho_{\text{vortex}}^{(\infty)} = \lim_{N_{\text{cell}} \rightarrow \infty} [\rho_{\text{vortex}}(N_{\text{cell}})]$  emerges in the confluent cell monolayer. Fig. 3 B illustrates how the intrinsic vortex density  $\rho_{\text{vortex}}^{(\infty)}$  is regulated by LA and CIL. We find that CIL promotes the generation of swirls. In contrast, LA is found to favor directed motion rather than swirling. Because swirls can not only adjust cell orientation but also facilitate cell rearrangements, we argue that CIL should play a crucial role in collective cell planar polarization and contribute to diversifying cell-cell contacts and communications, as evidenced by mounting cell neighbor exchanges via increasing CIL (Fig. S3). Such frequent neighbor exchanges might enable cells to probe environmental cues sensitively. Besides, it has been revealed that after the epithelial-mesenchymal transition, which often occurs during tumor progression, cancer cells exhibit enhanced CIL effect due to the loss of E-cadherin and the acquisition of N-cadherin (27). Therefore, more cellular swirls will emerge in more malignant cell systems. Our findings provide theoretical foundation for the phenomenological diagnostic criterion for such cancers as papillary thyroid carcinoma through the examination of swirling intensity (23).

Both our experiments (Fig. 1) and numerical simulations (Fig. 2 C) demonstrate that the swirls in cell monolayers manifest a specified length scale, as observed in many other cell lines (10,17). To explore this spatial scale, we calculate the spatial correlation function (SCF),  $C_v(r) = \langle \delta \mathbf{v}(\mathbf{x}) \cdot \delta \mathbf{v}(\mathbf{x} + \mathbf{r}) \rangle_{\mathbf{x}, \varphi} / \langle \delta \mathbf{v}(\mathbf{x}) \cdot \delta \mathbf{v}(\mathbf{x}) \rangle_{\mathbf{x}}$  of cell velocity, where  $\delta \mathbf{v}(\mathbf{x}) = \mathbf{v}(\mathbf{x}) - \bar{\mathbf{v}}$  is the velocity fluctuation field, with  $\bar{\mathbf{v}}$  being the spatial mean velocity vector;  $\langle \cdot \rangle_{\mathbf{x}, \varphi}$  computes an average over the spatial field  $\mathbf{x}$  and all directions  $\varphi = \arg(\mathbf{r})$ . The length scale of swirls (effective diameter),  $\xi_{\text{swirl}}$ , can be obtained by seeking the minimum of  $C_v(r)$  (8).

We first examine the SCF  $C_v(r)$  versus cell-cell distance  $r$  upon varying the intensity of LA (Fig. 3 C). It is seen that if there exists CIL interaction alone ( $\mu_a = 0$ ),  $C_v(r)$  exhibits a minimum at  $\sim 4$  cells, meaning that the typical size of swirls caused by CIL alone is approximately  $\xi_{\text{swirl}} \sim 4$  cell length. Increasing the LA intensity  $\mu_a$  will enlarge the size of swirls, as indicated by the right-shifting position of the minimum of  $C_v(r)$  (Fig. 3 C). The swirling dynamics will be suppressed if LA is sufficiently strong (e.g.,  $\mu_a = 0.08$ ). Moreover, we find that CIL tends to reduce the swirl size (Fig. 3 D), which can be attributed to its potential of promoting neighbor exchanges (Fig. S3). Overall, the LA-CIL regulated swirl size (diameter) ranges from  $\sim 4$  cells to several dozens of cells, in agreement with our experiments (10–15 cells) as well as previously reported results (10–20 cells). It is known that a larger size of cell cluster undergoing collective migration benefits efficiently transporting cells or molecules to distant location. However, a smaller scale of swirling allows more frequent exchanges of cell neighbors, enhancing biogenic mixing. Therefore, the coordination between LA and CIL may yield an optimal size of swirls, which may enable rapid molecular

or cell transport and adequate biomixing. Experimentally quantifying these in the future would be very useful.

## Migratory modes of collective cells in confined space

The in vivo migration of collective cells often confronts geometric confinements. In vitro experiments have revealed that boundary confinements could affect the migratory mode of collective cells confined in a finite space (13,18,19). To elucidate the influence of geometric confinements on the collective cell dynamics, we next consider cells confined in a circular domain of diameter  $D$ . The cell density is fixed as  $\rho_{\text{cell}} = 1$ , and the boundary vertices are allowed to slide along the perimeter freely. Besides, we take  $\mu_a = 0.05$  and  $\mu_c = 1$ , which results in an intrinsic swirl size of  $\sim 19$  cells.

Our simulations show that the cells confined in a small domain will self-organize into a persistent global rotation pattern, whereas those in a large domain will orchestrate into a dynamic swirling pattern (Fig. 4). We further use the rotational order parameter  $\phi_{\text{rotate}} = \left\langle \left| (1/N) \sum_J \hat{\mathbf{v}}_J \cdot \mathbf{e}_{\varphi J} \right| \right\rangle_t$  to quantify such mode transition, where  $\hat{\mathbf{v}}_J = \mathbf{v}_J / |\mathbf{v}_J|$  is the instantaneous motion direction of cell  $J$  and  $\mathbf{e}_{\varphi J}$  the circumferential direction. There exists a critical diameter  $D_{\text{cr}}$  below which  $\phi_{\text{rotate}}$  remains  $\sim 1$  and  $N_{\text{vortex}} = 1$  (Fig. 5). Increasing  $D$  beyond  $D_{\text{cr}}$  leads to a sharp decrease in  $\phi_{\text{rotate}}$  and a dramatic increase in  $N_{\text{vortex}}$ , indicating the breakdown of the persistent global rotation mode (Fig. 5). Here, the critical diameter of the confinement,  $D_{\text{cr}} \sim 20$  cell-length, is determined by taking  $\phi_{\text{rotate}} = 0.95$ , below which the system switches to a dynamic swirling mode. Notably,  $D_{\text{cr}}$  is very close to the intrinsic swirl size ( $\xi_{\text{swirl}} \sim 19$  cell length) in a cell monolayer without geometric constraints.

These results suggest that when collective cells are confined in a finite space, the length scale of the confinement also influences their self-organized patterns. The competition between the intrinsic and extrinsic scales leads to the migration pattern transition. Our prediction is consistent with relevant experiments (19).

## Density fluctuations in confluent cell monolayers

Giant density (or number) fluctuations, which are a hallmark of the inhomogeneous spatial distribution of individual components, have been recognized as a powerful indicator of mesoscopic scale fluctuations in both active particulate systems (44,45) and biological systems (10,16,46–48). In these systems, populations spontaneously form scattered, closely packed clusters with high local density. Those clusters are mobile and often leave empty space or gaps in regions they just pass, inducing low density therein. Consequently, migratory clusters often engender giant density

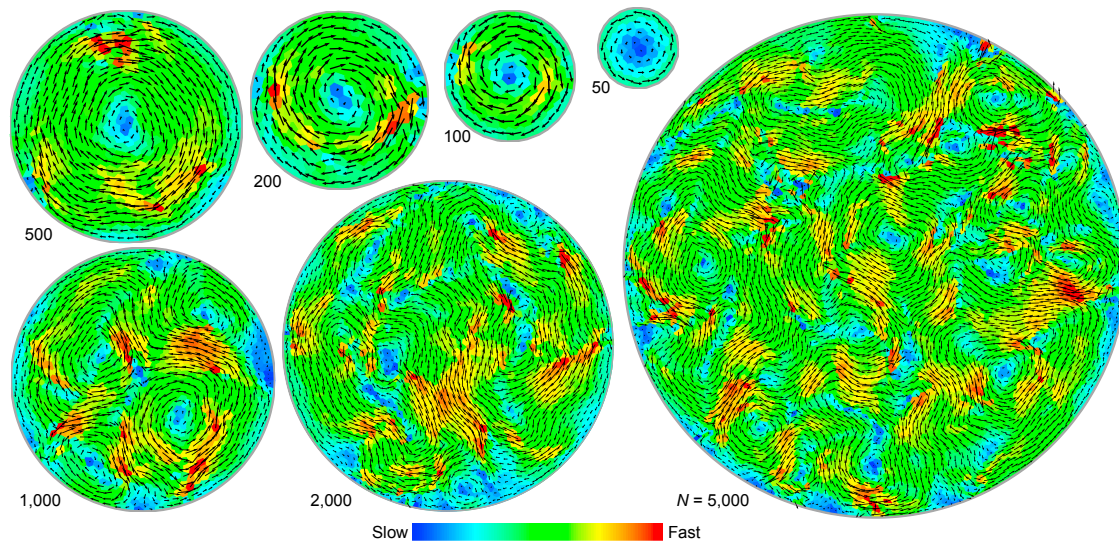

FIGURE 4 Patterns of collective cell migration confined in circular domain with different diameters. In different domains, cell population  $N$  is varied but cell density  $\rho_{\text{cell}} = 1$  is kept constant. The arrows denote velocity vectors of cells, and the color code indicates magnitude of cell velocity. Parameter values:  $\mu_a = 0.05$  and  $\mu_c = 1.0$ . To see this figure in color, go online.

fluctuations. In our system, however, all cells are mechanically linked to their neighbors in the gap-free monolayer. We wonder whether giant density fluctuations may be triggered and modulated by intercellular social interactions in a confluent cell sheet.

To quantify the density fluctuations in a cell monolayer, we calculate the number fluctuations  $\Delta N = \sqrt{\langle (N_L - \langle N_L \rangle)^2 \rangle}$  of cells in a square subregion of linear size  $L$ , containing an

average number of cells,  $\langle N_L \rangle$ . It is observed that the number fluctuations scales as  $\Delta N \sim \langle N_L \rangle^\beta$  (Fig. 6 A). The scaling exponent  $\beta$  characterizes the dynamics of number fluctuations:  $\beta = 1/2$  corresponds to a thermodynamic equilibrium, whereas  $\beta < 1/2$  and  $\beta > 1/2$  denote suppressed and enhanced density fluctuations, respectively. According to the scaling exponent  $\beta$ , we establish a phase diagram to illustrate the effects of LA and CIL (Fig. 6 B). It shows that if either LA or CIL is strong alone, the system exhibits suppressed density fluctuations, resulting in a hyperuniform distribution of cells in which the characteristic size of cells across the whole monolayer is uniform. Surprisingly, the coordination between LA and CIL can result in giant density fluctuations with  $\beta > 1/2$ , leading to phase separation. The density fluctuations can be intuitively reflected by the local cell density field  $\bar{\rho}_{\text{cell}}^{(J)} = \rho_{\text{cell}}^{(J)} - \langle \rho_{\text{cell}}^{(J)} \rangle_J$  with  $\rho_{\text{cell}}^{(J)} = A_0/A_J$  (Fig. 6 C). If either LA or CIL is strong alone, the local cell density field exhibits a uniform spatial distribution. When LA and CIL are appropriately coordinated, however, giant density fluctuations may emerge, and the spatial cell density exhibits a strong heterogeneity in which large or small cells gather and move as a group, breaking the orientational symmetry of collective migration. Such density heterogeneity may also engender heterogeneous mechanical properties in epithelial tissues. We reveal that under the interplay of LA and CIL, the scaling exponent  $\beta$  can be as high as 0.8, comparable to those emerging in other biological systems such as bacterial suspensions (46), fibroblast cells (47), and neural progenitor cells (48).

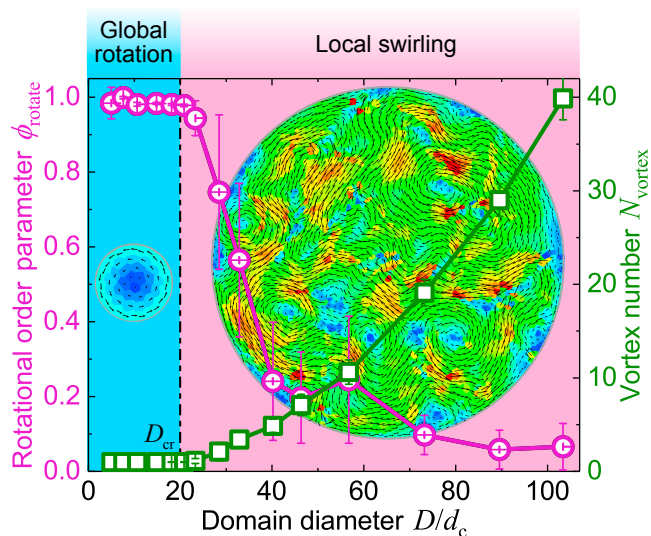

FIGURE 5 Motion modes of collective cells confined in a circular domain. The rotational order parameter  $\phi_{\text{rotate}}$  and the vortex number  $N_{\text{vortex}}$  vary with the diameter  $D$ . Data are mean  $\pm$  SD. The inset images show the velocity field of two typical modes: global rotation and local swirling. Parameter values:  $\mu_a = 0.05$  and  $\mu_c = 1.0$ . To see this figure in color, go online.

## DISCUSSION

We have established an active vertex model to investigate collective dynamics of cell migration in confluent

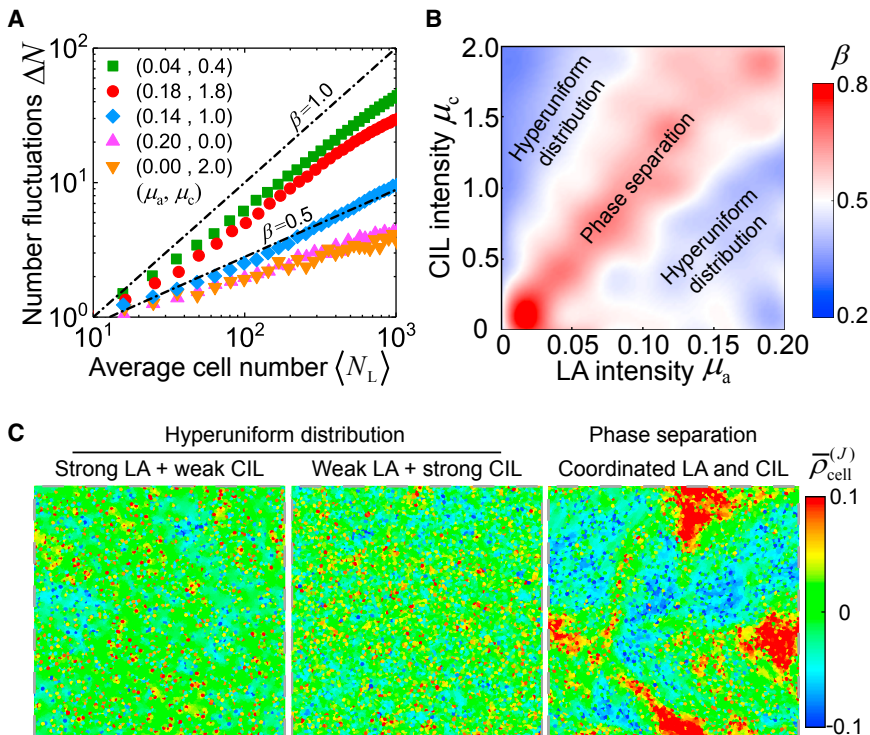

FIGURE 6 Density fluctuations in a confluent cell monolayer tailored by intercellular social interactions. (A) Number fluctuations  $\Delta N$  versus average number  $\langle N_L \rangle$  of cells in a subregion of size  $L$  under different intensities of LA and CIL. (B) A phase diagram of the scaling exponent  $\beta$  of number fluctuations is shown. (C) The local cell density field for hyperuniform distribution of cells (left and middle) and phase separation pattern (right). The color denotes the local cell density field  $\bar{\rho}_{\text{cell}}^{(j)}$ . From left to right, parameter values are taken as  $(\mu_a, \mu_c) = (0.2, 0.1), (0.01, 2.0),$  and  $(0.12, 1.4)$ . To see this figure in color, go online.

monolayers. We show that the cell-level LA-CIL coordination can engender the tissue-level migration modes and dynamic structures, which are further modulated by environmental confinements. These modes and structures are not only essential for cell-cell communication, molecular transport, and environmental probing in cell monolayers but may also provide possible means of diagnosis for some carcinoma. Although much effort has been directed toward collective cell migration (2,3,8–10,12,13,17,18,20,25,26,31,34–37,40,49–54), our theoretical model uniquely identifies how the coordination of cellular-level social interactions sculpts morphodynamics at the tissue scale.

In the literature, several models have also been proposed to investigate collective cell migration. Some models considered cell polarity to be self-renewal, in which cell re-orientation was treated as either a pure diffusive process (34) or a memory process in which cells adapted to the previous motion (12,33,35–38), or a mechanical process in which cells adjusted along the long axis of cell shape to obtain plithotaxis (25). In addition, some studies attributed cell polarity to the effect of intercellular social interactions including alignment and repulsion. For example, the LA effect was introduced to examine flocking transition in cell collectives (24,25,39). The CIL effect was taken into account to decode chemotaxis or cell colony dynamics (20,26,40). However, most of these previous studies considered only one kind of intercellular social interaction. In general, both LA and CIL effects function in cell polarity. In this work, we integrate LA and CIL into an active

vertex model to scrutinize collective cell dynamics. We show that the trade-off between the two kinds of intercellular interactions dictates the emergence of dynamic coherent structures, spatial scales, and phase separation in cell monolayers.

Mechanical cues, e.g., intercellular adhesion (18,55) and substrate stiffness (8,50), have been revealed to regulate collective cell migration via affecting cell polarity or cell-cell communication. Recent studies demonstrated that geometric constraints also dictate collective cell migration in a confined space, engendering persistent angular rotations or dynamic swirls (11–13). In this study, we argue that the coordinated cell rotation and swirling in a circular domain can be ascribed to the competition between the social-interaction-induced intrinsic length scale and the external scale of geometric confinement. We believe this argument could provide novel insights into constrained collective cell dynamics. The scale-competition mechanism also helps us understand collective cell motion in other confined spaces such as channels (18) and cylinders (52). For instance, previous experiments showed that the modes of epithelial flow confined in a long channel can be tailored by its width: collectively directed migration generally occurs in narrow channels, whereas wide channels favor local swirling of cells (18). Such a mode transition can be readily interpreted by the scale competition mechanism proposed here. An open question is how topology and anisotropy of confinement mediate collective cell dynamics.

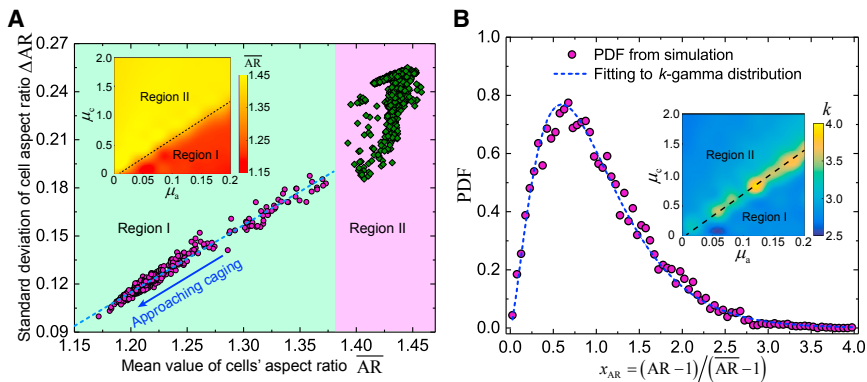

the corresponding correlation coefficient  $R^2 = 0.9765$ . The inset shows a phase diagram of the mean cell aspect ratio  $\overline{AR}$  regulated by LA and CIL. (B) The probability density functions (PDFs) of cell shape collapse into a family of PDFs upon varying the intensities of LA and CIL. Typical PDF of the rescaled cell aspect ratio  $x_{AR} = (AR - 1)/(\overline{AR} - 1)$ . The dashed curve corresponds to the fitting to  $k$ - $\gamma$  distribution via maximal likelihood estimation. The inset shows a phase diagram of the shape parameter  $k$  tailored by LA and CIL. The definition of regions I and II are consistent with (A). To see this figure in color, go online.

Giant density fluctuations, usually recognized as a prominent feature of nonequilibrium dynamics, have been investigated extensively in active particle systems. Recently, it was reported that giant density fluctuations also emerge in biological systems. For instance, it has been experimentally measured and theoretically predicted that bacterial suspensions (16,46) and cell monolayers (10,40,47,48) can self-organize into a phase-separated state featuring giant density fluctuations. In our work, we find that social interactions among cell collectives tailor the density fluctuations in a coherent cell monolayer and can even generate giant density fluctuations. Moreover, such giant density fluctuations are not restricted to emerging in the highly ordered state of collective motions but take place in a state with the motion order in a rather broad range (Fig. S4). This is quite different from active particle systems (14), revealing a distinct dynamic feature for coherent cell systems.

Epithelial morphogenesis is always accompanied by cell shape variation, as observed during wound healing and cancer metastasis (1,2). Very recently, it has been revealed that the variation and distribution of cell shapes collapse to potentially universal laws across diverse epithelial systems as the jamming transition of cell collectives is approached (56). Specifically, across diverse epithelial systems, there exists a potentially universal linear relationship between the mean and the variation of cells' aspect ratio, and moreover the distribution of cells' aspect ratio collapses to a family of  $k$ - $\gamma$  distributions. We wonder whether and how the social interactions among cells affect cell shape variation and distribution in an epithelial-like monolayer. Our simulations show that under the social interactions among cells—LA and CIL—the relationship between the variation and the mean of cells' aspect ratio remains linear as the monolayer approaches caging (i.e., active jamming) (Fig. 7 A). However, this relationship deviates from a linear one when the CIL interaction is relatively strong

(Fig. 7 A), presumably due to the frequent “cage relative” cell movements in such situation. Nevertheless, under the regulation of LA and CIL, the probability density functions (PDFs) of cell aspect ratio still collapse into a family of PDFs (Fig. 7 B). Such PDFs can be well fitted by the  $k$ - $\gamma$  distribution  $f_{\Gamma}(x;k) = k^k x^{k-1} e^{-kx}/\Gamma(k)$  with  $\Gamma(\cdot)$  the Legendre  $\gamma$  function and  $k$  the shape parameter that characterizes the shape of the  $k$ - $\gamma$  distribution. It is found that the shape parameter  $k$  mainly locates in the range 2.5–3.0 (Fig. 7 B), in agreement with experimental measurements (2–2.5) (56). These findings deepen our understanding of the cell shape variation in epithelial tissues away from jamming transition.

In our study, we do not involve the detailed biochemical signaling pathways. Recent work on *Drosophila* amnioserosa and MDCK monolayers identified the critical role of intracellular contraction and polarity in epithelial morphogenesis (31,57). In fact, cell contractility as well as cell polarity is related to the complicated intracellular signaling pathways and transmembrane transport of signaling molecules (58,59). In addition, the collective migration of cells is also affected by stiffness, topology, and curvature of the underlying substrate (3,8,50–52). These issues merit further investigation to develop refined theories toward addressing the intricate cell dynamics.

## SUPPORTING MATERIAL

Supporting Materials and Methods and four figures are available at [http://www.biophysj.org/biophysj/supplemental/S0006-3495\(18\)31062-2](http://www.biophysj.org/biophysj/supplemental/S0006-3495(18)31062-2).

## AUTHOR CONTRIBUTIONS

B.L. and X.-Q.F. designed research. S.-Z.L., S.Y., G.-K.X., B.L., and X.-Q.F. performed research. S.-Z.L., B.L., and X.-Q.F. analyzed data. S.-Z.L., B.L., G.-K.X., and X.-Q.F. wrote the manuscript.



## ACKNOWLEDGMENTS

Support from the National Natural Science Foundation of China (grants no. 11620101001, 11672161, 11672227, and 11432008), Tsinghua University (grant no. 20151080441), and the Thousand Young Talents Program of China are acknowledged.

## REFERENCES

- Friedl, P., J. Locker, ..., J. E. Segall. 2012. Classifying collective cancer cell invasion. *Nat. Cell Biol.* 14:777–783.
- Anon, E., X. Serra-Picamal, ..., B. Ladoux. 2012. Cell crawling mediates collective cell migration to close undamaged epithelial gaps. *Proc. Natl. Acad. Sci. USA.* 109:10891–10896.
- Behrndt, M., G. Salbreux, ..., C. P. Heisenberg. 2012. Forces driving epithelial spreading in zebrafish gastrulation. *Science.* 338:257–260.
- Bertet, C., L. Sulak, and T. Lecuit. 2004. Myosin-dependent junction remodelling controls planar cell intercalation and axis elongation. *Nature.* 429:667–671.
- Solon, J., A. Kaya-Copur, ..., D. Brunner. 2009. Pulsed forces timed by a ratchet-like mechanism drive directed tissue movement during dorsal closure. *Cell.* 137:1331–1342.
- Mayor, R., and S. Etienne-Manneville. 2016. The front and rear of collective cell migration. *Nat. Rev. Mol. Cell Biol.* 17:97–109.
- Lauffenburger, D. A., and A. F. Horwitz. 1996. Cell migration: a physically integrated molecular process. *Cell.* 84:359–369.
- Angelini, T. E., E. Hannezo, ..., D. A. Weitz. 2010. Cell migration driven by cooperative substrate deformation patterns. *Phys. Rev. Lett.* 104:168104.
- Angelini, T. E., E. Hannezo, ..., D. A. Weitz. 2011. Glass-like dynamics of collective cell migration. *Proc. Natl. Acad. Sci. USA.* 108:4714–4719.
- Garcia, S., E. Hannezo, ..., N. S. Gov. 2015. Physics of active jamming during collective cellular motion in a monolayer. *Proc. Natl. Acad. Sci. USA.* 112:15314–15319.
- Tanner, K., H. Mori, ..., M. J. Bissell. 2012. Coherent angular motion in the establishment of multicellular architecture of glandular tissues. *Proc. Natl. Acad. Sci. USA.* 109:1973–1978.
- Li, B., and S. X. Sun. 2014. Coherent motions in confluent cell monolayer sheets. *Biophys. J.* 107:1532–1541.
- Seegerer, F. J., F. Thüroff, ..., J. O. Rädler. 2015. Emergence and persistence of collective cell migration on small circular micropatterns. *Phys. Rev. Lett.* 114:228102.
- Marchetti, M. C., J. Joanny, ..., R. A. Simha. 2013. Hydrodynamics of soft active matter. *Rev. Mod. Phys.* 85:1143–1189.
- Vicsek, T., and A. Zafeiris. 2012. Collective motion. *Phys. Rep.* 517:71–140.
- Wensink, H. H., J. Dunkel, ..., J. M. Yeomans. 2012. Meso-scale turbulence in living fluids. *Proc. Natl. Acad. Sci. USA.* 109:14308–14313.
- Das, T., K. Safferling, ..., J. P. Spatz. 2015. A molecular mechanotransduction pathway regulates collective migration of epithelial cells. *Nat. Cell Biol.* 17:276–287.
- Vedula, S. R., M. C. Leong, ..., B. Ladoux. 2012. Emerging modes of collective cell migration induced by geometrical constraints. *Proc. Natl. Acad. Sci. USA.* 109:12974–12979.
- Doxzen, K., S. R. Vedula, ..., C. T. Lim. 2013. Guidance of collective cell migration by substrate geometry. *Integr. Biol.* 5:1026–1035.
- Camley, B. A., Y. Zhang, ..., W. J. Rappel. 2014. Polarity mechanisms such as contact inhibition of locomotion regulate persistent rotational motion of mammalian cells on micropatterns. *Proc. Natl. Acad. Sci. USA.* 111:14770–14775.
- Stroka, K. M., H. Jiang, ..., K. Konstantopoulos. 2014. Water permeation drives tumor cell migration in confined microenvironments. *Cell.* 157:611–623.
- Lubarsky, B., and M. A. Krasnow. 2003. Tube morphogenesis: making and shaping biological tubes. *Cell.* 112:19–28.
- Szporn, A. H., S. Yuan, ..., D. E. Burstein. 2006. Cellular swirls in fine needle aspirates of papillary thyroid carcinoma: a new diagnostic criterion. *Mod. Pathol.* 19:1470–1473.
- Sepúlveda, N., L. Petitjean, ..., V. Hakim. 2013. Collective cell motion in an epithelial sheet can be quantitatively described by a stochastic interacting particle model. *PLoS Comput. Biol.* 9:e1002944.
- Barton, D. L., S. Henkes, ..., R. Sknepnek. 2017. Active Vertex Model for cell-resolution description of epithelial tissue mechanics. *PLoS Comput. Biol.* 13:e1005569.
- Camley, B. A., J. Zimmermann, ..., W. J. Rappel. 2016. Emergent collective chemotaxis without single-cell gradient sensing. *Phys. Rev. Lett.* 116:098101.
- Stramer, B., and R. Mayor. 2016. Mechanisms and in vivo functions of contact inhibition of locomotion. *Nat. Rev. Mol. Cell Biol.* 18:43–55.
- Nagai, T., and H. Honda. 2001. A dynamic cell model for the formation of epithelial tissues. *Philos. Mag. B.* 81:699–719.
- Fletcher, A. G., M. Osterfield, ..., S. Y. Shvartsman. 2014. Vertex models of epithelial morphogenesis. *Biophys. J.* 106:2291–2304.
- Bi, D., J. Lopez, ..., M. L. Manning. 2015. A density-independent rigidity transition in biological tissues. *Nat. Phys.* 11:1074–1079.
- Lin, S. Z., B. Li, ..., X. Q. Feng. 2017. Activation and synchronization of the oscillatory morphodynamics in multicellular monolayer. *Proc. Natl. Acad. Sci. USA.* 114:8157–8162.
- Alt, S., P. Ganguly, and G. Salbreux. 2017. Vertex models: from cell mechanics to tissue morphogenesis. *Philos. Trans. R. Soc. Lond. B Biol. Sci.* 372:20150520.
- Koride, S., A. J. Loza, and S. X. Sun. 2018. Epithelial vertex models with active biochemical regulation of contractility can explain organized collective cell motility. *APL Bioeng.* 2:031906.
- Bi, D., X. Yang, ..., M. L. Manning. 2016. Motility-driven glass and jamming transitions in biological tissues. *Phys. Rev. X.* 6:021011.
- Giavazzi, F., M. Paoluzzi, ..., M. C. Marchetti. 2018. Flocking transitions in confluent tissues. *Soft Matter.* 14:3471–3477.
- Malinverno, C., S. Corallino, ..., G. Scita. 2017. Endocytic reawakening of motility in jammed epithelia. *Nat. Mater.* 16:587–596.
- Basan, M., J. Elgeti, ..., H. Levine. 2013. Alignment of cellular motility forces with tissue flow as a mechanism for efficient wound healing. *Proc. Natl. Acad. Sci. USA.* 110:2452–2459.
- Kabla, A. J. 2012. Collective cell migration: leadership, invasion and segregation. *J. R. Soc. Interface.* 9:3268–3278.
- Chaté, H., F. Ginelli, ..., F. Raynaud. 2008. Modeling collective motion: variations on the Vicsek model. *Eur. Phys. J. B.* 64:451–456.
- Smeets, B., R. Alert, ..., R. Vincent. 2016. Emergent structures and dynamics of cell colonies by contact inhibition of locomotion. *Proc. Natl. Acad. Sci. USA.* 113:14621–14626.
- Vicsek, T., A. Czirók, ..., O. Shochet. 1995. Novel type of phase transition in a system of self-driven particles. *Phys. Rev. Lett.* 75:1226–1229.
- Farrell, F. D., M. C. Marchetti, ..., J. Tailleur. 2012. Pattern formation in self-propelled particles with density-dependent motility. *Phys. Rev. Lett.* 108:248101.
- Giomi, L. 2015. Geometry and topology of turbulence in active nematics. *Phys. Rev. X.* 5:031003.
- Narayan, V., S. Ramaswamy, and N. Menon. 2007. Long-lived giant number fluctuations in a swarming granular nematic. *Science.* 317:105–108.
- Fily, Y., and M. C. Marchetti. 2012. Athermal phase separation of self-propelled particles with no alignment. *Phys. Rev. Lett.* 108:235702.
- Zhang, H. P., A. Be'er, ..., H. L. Swinney. 2010. Collective motion and density fluctuations in bacterial colonies. *Proc. Natl. Acad. Sci. USA.* 107:13626–13630.

47. Duclos, G., S. Garcia, ..., P. Silberzan. 2014. Perfect nematic order in confined monolayers of spindle-shaped cells. *Soft Matter*. 10:2346–2353.
48. Kawaguchi, K., R. Kageyama, and M. Sano. 2017. Topological defects control collective dynamics in neural progenitor cell cultures. *Nature*. 545:327–331.
49. Yang, X., D. Bi, ..., M. C. Marchetti. 2017. Correlating cell shape and cellular stress in motile confluent tissues. *Proc. Natl. Acad. Sci. USA*. 114:12663–12668.
50. Sunyer, R., V. Conte, ..., X. Trepac. 2016. Collective cell durotaxis emerges from long-range intercellular force transmission. *Science*. 353:1157–1161.
51. Xi, W., S. Sonam, ..., C. Teck Lim. 2017. Emergent patterns of collective cell migration under tubular confinement. *Nat. Commun.* 8:1517.
52. Yevick, H. G., G. Duclos, ..., P. Silberzan. 2015. Architecture and migration of an epithelium on a cylindrical wire. *Proc. Natl. Acad. Sci. USA*. 112:5944–5949.
53. Qian, J., H. Liu, ..., H. Gao. 2013. A mechanochemical model of cell reorientation on substrates under cyclic stretch. *PLoS One*. 8:e65864.
54. Xu, G. K., X. Q. Feng, and H. Gao. 2018. Orientations of cells on compliant substrates under biaxial stretches: a theoretical study. *Biophys. J.* 114:701–710.
55. Benjamin, J. M., A. V. Kwiatkowski, ..., W. J. Nelson. 2010. AlphaE-catenin regulates actin dynamics independently of cadherin-mediated cell-cell adhesion. *J. Cell Biol.* 189:339–352.
56. Atia, L., D. Bi, ..., J. J. Fredberg. 2018. Geometric constraints during epithelial jamming. *Nat. Phys.* 14:613–620.
57. Vig, D. K., A. E. Hamby, and C. W. Wolgemuth. 2017. Cellular contraction can drive rapid epithelial flows. *Biophys. J.* 113:1613–1622.
58. Mogilner, A., J. Allard, and R. Wollman. 2012. Cell polarity: quantitative modeling as a tool in cell biology. *Science*. 336:175–179.
59. Butler, M. T., and J. B. Wallingford. 2017. Planar cell polarity in development and disease. *Nat. Rev. Mol. Cell Biol.* 18:375–388.
60. Girard, P. P., E. A. Cavalcanti-Adam, ..., J. P. Spatz. 2007. Cellular chemomechanics at interfaces: sensing, integration and response. *Soft Matter*. 3:307–326.
61. Hannezo, E., J. Prost, and J. F. Joanny. 2014. Theory of epithelial sheet morphology in three dimensions. *Proc. Natl. Acad. Sci. USA*. 111:27–32.
62. Forgacs, G., R. A. Foty, ..., M. S. Steinberg. 1998. Viscoelastic properties of living embryonic tissues: a quantitative study. *Biophys. J.* 74:2227–2234.
63. Cochet-Escartin, O., J. Ranft, ..., P. Marcq. 2014. Border forces and friction control epithelial closure dynamics. *Biophys. J.* 106:65–73.

**Biophysical Journal, Volume 115**

**Supplemental Information**

**Dynamic Migration Modes of Collective Cells**

**Shao-Zhen Lin, Sang Ye, Guang-Kui Xu, Bo Li, and Xi-Qiao Feng**

# Supporting Material for “Dynamic Migration Modes of Collective Cells”

Shao-Zhen Lin,<sup>1</sup> Sang Ye,<sup>1</sup> Guang-Kui Xu,<sup>2</sup> Bo Li,<sup>1</sup> and Xi-Qiao Feng<sup>1</sup>

<sup>1</sup>*Institute of Biomechanics and Medical Engineering, Applied Mechanics Laboratory,*

*Department of Engineering Mechanics, Tsinghua University, Beijing, China*

<sup>2</sup>*International Center for Applied Mechanics, State Key Laboratory for Strength and Vibration of Mechanical Structures, Xi'an Jiaotong University, Xi'an, China*

In this Supporting Material, we provide more details for derivation and numerical simulations. Additional data and figures are also included to support the results and conclusions given in the main text.

## 1. Normalization of the controlling equations

We integrate two typical intercellular social interactions — local alignment (LA) and contact inhibition of locomotion (CIL) into our active vertex model to investigate collective cell dynamics in a coherent cell monolayer. In the main text, we have given the controlling equation for the time evolution of vertices' positions,  $\mathbf{r}_i(t)$ , as

$$\frac{d\mathbf{r}_i}{dt} = \frac{1}{\gamma} \mathbf{f}_i^U + \sum_{J \in C_i} \frac{v_0 \mathbf{p}_J}{n_J} + \sum_{J \in C_i} \frac{\varepsilon_T \boldsymbol{\eta}_J^T(t)}{n_J}. \quad (\text{S1})$$

From the potential energy given by Eq. (1) in the main text, the potential force  $\mathbf{f}_i^U$  can be derived as

$$\mathbf{f}_i^U = - \sum_{J \in C_i} \frac{1}{2} K_a (A_J - A_0) [\mathbf{k} \times (\mathbf{r}_{j_2} - \mathbf{r}_{j_1})] - \sum_{J \in C_i} K_c L_J \left( \frac{\mathbf{r}_i - \mathbf{r}_{j_1}}{|\mathbf{r}_i - \mathbf{r}_{j_1}|} + \frac{\mathbf{r}_i - \mathbf{r}_{j_2}}{|\mathbf{r}_i - \mathbf{r}_{j_2}|} \right) - \sum_{j \in V_i} \Lambda \frac{\mathbf{r}_i - \mathbf{r}_j}{|\mathbf{r}_i - \mathbf{r}_j|}, \quad (\text{S2})$$

where  $\mathbf{k}$  denotes a unit vector normal to the cell monolayer; the summation  $\sum_{J \in C_i}$  computes over all cells  $C_i$  sharing vertex  $i$ , and  $j_1$  and  $j_2$  are the neighboring vertices of vertex  $i$  in cell  $J$ ; the summation  $\sum_{j \in V_i}$  is made over all neighboring vertices  $V_i$  of vertex  $i$ . Substituting (S2) into (S1), we obtain

$$\begin{aligned} \frac{d\mathbf{r}_i}{dt} = & - \frac{1}{\gamma} \sum_{J \in C_i} \frac{1}{2} K_a (A_J - A_0) [\mathbf{k} \times (\mathbf{r}_{j_2} - \mathbf{r}_{j_1})] - \frac{1}{\gamma} \sum_{J \in C_i} K_c L_J \left( \frac{\mathbf{r}_i - \mathbf{r}_{j_1}}{|\mathbf{r}_i - \mathbf{r}_{j_1}|} + \frac{\mathbf{r}_i - \mathbf{r}_{j_2}}{|\mathbf{r}_i - \mathbf{r}_{j_2}|} \right) \\ & - \frac{1}{\gamma} \sum_{j \in V_i} \Lambda \frac{\mathbf{r}_i - \mathbf{r}_j}{|\mathbf{r}_i - \mathbf{r}_j|} + \sum_{J \in C_i} \frac{v_0 \mathbf{p}_J}{n_J} + \sum_{J \in C_i} \frac{\varepsilon_T \boldsymbol{\eta}_J^T(t)}{n_J}. \end{aligned} \quad (\text{S3})$$

Besides, the cell polarity  $\mathbf{p}_J = (\cos \theta_J, \sin \theta_J)$  is mediated by LA and CIL, and evolves as

$$\frac{d\theta_J}{dt} = \frac{\mu_a}{n_J} \sum_{K \in C_J} \sin(\theta_K^{(\text{vel})} - \theta_J) + \frac{\mu_c}{n_J} \sum_{K \in C_J} \sin(\alpha_{J,K} - \theta_J) + \varepsilon_R \eta_J^R(t). \quad (\text{S4})$$

We normalize the governing equations for the vertices' positions (i.e. (S3)) and the polarity directions of cells (i.e. (S4)) through the length scale  $l = \sqrt{A_0}$  and the time scale  $\tau = \gamma / (K_a A_0)$ . The normalized equations can be written as

$$\begin{aligned} \frac{d\tilde{\mathbf{r}}_i}{d\tilde{t}} = & - \sum_{J \in C_i} \frac{1}{2} (\tilde{A}_J - 1) [\mathbf{k} \times (\tilde{\mathbf{r}}_{j_2} - \tilde{\mathbf{r}}_{j_1})] - \sum_{J \in C_i} \tilde{K}_c \tilde{L}_J \left( \frac{\tilde{\mathbf{r}}_i - \tilde{\mathbf{r}}_{j_1}}{|\tilde{\mathbf{r}}_i - \tilde{\mathbf{r}}_{j_1}|} + \frac{\tilde{\mathbf{r}}_i - \tilde{\mathbf{r}}_{j_2}}{|\tilde{\mathbf{r}}_i - \tilde{\mathbf{r}}_{j_2}|} \right) \\ & - \sum_{j \in V_i} \tilde{\Lambda} \frac{\tilde{\mathbf{r}}_i - \tilde{\mathbf{r}}_j}{|\tilde{\mathbf{r}}_i - \tilde{\mathbf{r}}_j|} + \sum_{J \in C_i} \frac{\tilde{v}_0 \mathbf{p}_J}{n_J} + \sum_{J \in C_i} \frac{\tilde{\varepsilon}_T \tilde{\boldsymbol{\eta}}_J^T(\tilde{t})}{n_J} \end{aligned} \quad (\text{S5})$$

and

$$\frac{d\theta_J}{d\tilde{t}} = \frac{\tilde{\mu}_a}{n_J} \sum_{K \in C_J} \sin(\theta_K^{(\text{vel})} - \theta_J) + \frac{\tilde{\mu}_c}{n_J} \sum_{K \in C_J} \sin(\alpha_{J,K} - \theta_J) + \tilde{\varepsilon}_R \tilde{\eta}_J^R(\tilde{t}), \quad (\text{S6})$$

where the dimensionless parameters are defined as

$$\begin{aligned}
\tilde{\mathbf{r}}_i &= \frac{\mathbf{r}_i}{\sqrt{A_0}}, & \tilde{t} &= \frac{t}{\tau}, & \tilde{A}_J &= \frac{A_J}{A_0}, & \tilde{L}_J &= \frac{L_J}{\sqrt{A_0}}, \\
\tilde{K}_c &= \frac{K_c}{K_a A_0}, & \tilde{\Lambda} &= \frac{\Lambda}{K_a A_0^{3/2}}, & \tilde{v}_0 &= \frac{v_0 \tau}{\sqrt{A_0}}, & \tilde{\mu}_a &= \mu_a \tau, & \tilde{\mu}_c &= \mu_c \tau, \\
\tilde{\varepsilon}_T &= \frac{\varepsilon_T \sqrt{\tau}}{\sqrt{A_0}}, & \tilde{\eta}_J^T &= \eta_J^T \sqrt{\tau}, & \tilde{\varepsilon}_R &= \varepsilon_R \sqrt{\tau}, & \tilde{\eta}_J^R &= \eta_J^R \sqrt{\tau}.
\end{aligned} \tag{S7}$$

## 2. Estimation of the dimensionless parameters

According to experimental measurements (1), the viscosity of biological tissues is in the order of  $10^4 - 10^5 \text{ N} \cdot \text{s} \cdot \text{m}^{-2}$ , leading to an estimation of the friction coefficient  $\gamma \sim 0.01 - 0.1 \text{ N} \cdot \text{s} \cdot \text{m}^{-1}$ . Taking the cell areal stiffness  $K_a \sim 10^5 - 10^7 \text{ N} \cdot \text{m}^{-3}$  for epithelial tissues (2, 3), and the reference area  $A_0 = 900 \mu\text{m}^2$ , we have the estimation of the length scale and the time scale used for normalization as  $l = \sqrt{A_0} \sim 30 \mu\text{m}$  and  $\tau = \gamma / (K_a A_0) \sim 100 \text{ s}$ , respectively. The cell contraction force is in the range of  $1 - 10 \text{ nN}$  for epithelial cell sheets (4), corresponding to the cell contraction modulus  $K_c \sim 10^{-5} - 10^{-4} \text{ N} \cdot \text{m}^{-1}$ . The intercellular tension is of the order  $\Lambda \sim 10^{-9} - 10^{-8} \text{ N}$ , as estimated from experimental measurements on biological tissues (1). Therefore, we have the estimation of dimensionless cell contractile modulus  $\tilde{K}_c = K_c / (K_a A_0) \sim 0.01 - 0.1$  and the dimensionless intercellular tension  $\tilde{\Lambda} = \Lambda / (K_a A_0^{3/2}) \sim 0.01 - 0.1$ . Besides, the cell protrusive force is of the order  $1 \text{ nN}$  (5), resulting in a self-propelled velocity  $v_0 \sim 10^{-8} - 10^{-7} \text{ m} \cdot \text{s}^{-1}$ , with its dimensionless form of the order  $\tilde{v}_0 = v_0 \tau / \sqrt{A_0} \sim 0.01 - 0.1$ . Consequently, we use the following values for the dimensionless parameters in our study:  $\tilde{K}_c = 0.02$ ,  $\tilde{\Lambda} = 0.1$ ,  $\tilde{v}_0 = 0.1$ . Besides, the intensities of LA and CIL (in their dimensionless forms) are assumed to be of the order  $\tilde{\mu}_a = 0.1$  and  $\tilde{\mu}_c = 1.0$ , respectively. Moreover, to focus on the roles of LA and CIL in regulating collective cell dynamics in a confluent cell monolayer, we set the noises  $\varepsilon_T = 0$  and  $\varepsilon_R = 0$  for simplicity.

## References

1. Forgacs, G., Foty, R. A., Shafirir, Y. & Steinberg, M. S. Viscoelastic properties of living embryonic tissues: a quantitative study. *Biophys. J.* **74**, 2227–2234 (1998).
2. Girard, P. P., Cavalcanti-Adam, E. A., Kemkemer, R. & Spatz, J. P. Cellular chemomechanics at interfaces: sensing, integration and response. *Soft Matter* **3**, 307–326 (2007).
3. Solon, J., Kaya-Copur, A., Colombelli, J. & Brunner, D. Pulsed forces timed by a ratchet-like mechanism drive directed tissue movement during dorsal closure. *Cell* **137**, 1331–1342 (2009).
4. Hannezo, E., Prost, J. & Joanny, J. F. Theory of epithelial sheet morphology in three dimensions. *Proc. Natl. Acad. Sci. USA* **111**, 27–32 (2014).
5. Cochet-Escartin, O., Ranft, J., Silberzan, P. & Marcq, P. Border forces and friction control epithelial closure dynamics. *Biophys. J.* **106**, 6573 (2014).

Supplemental figures

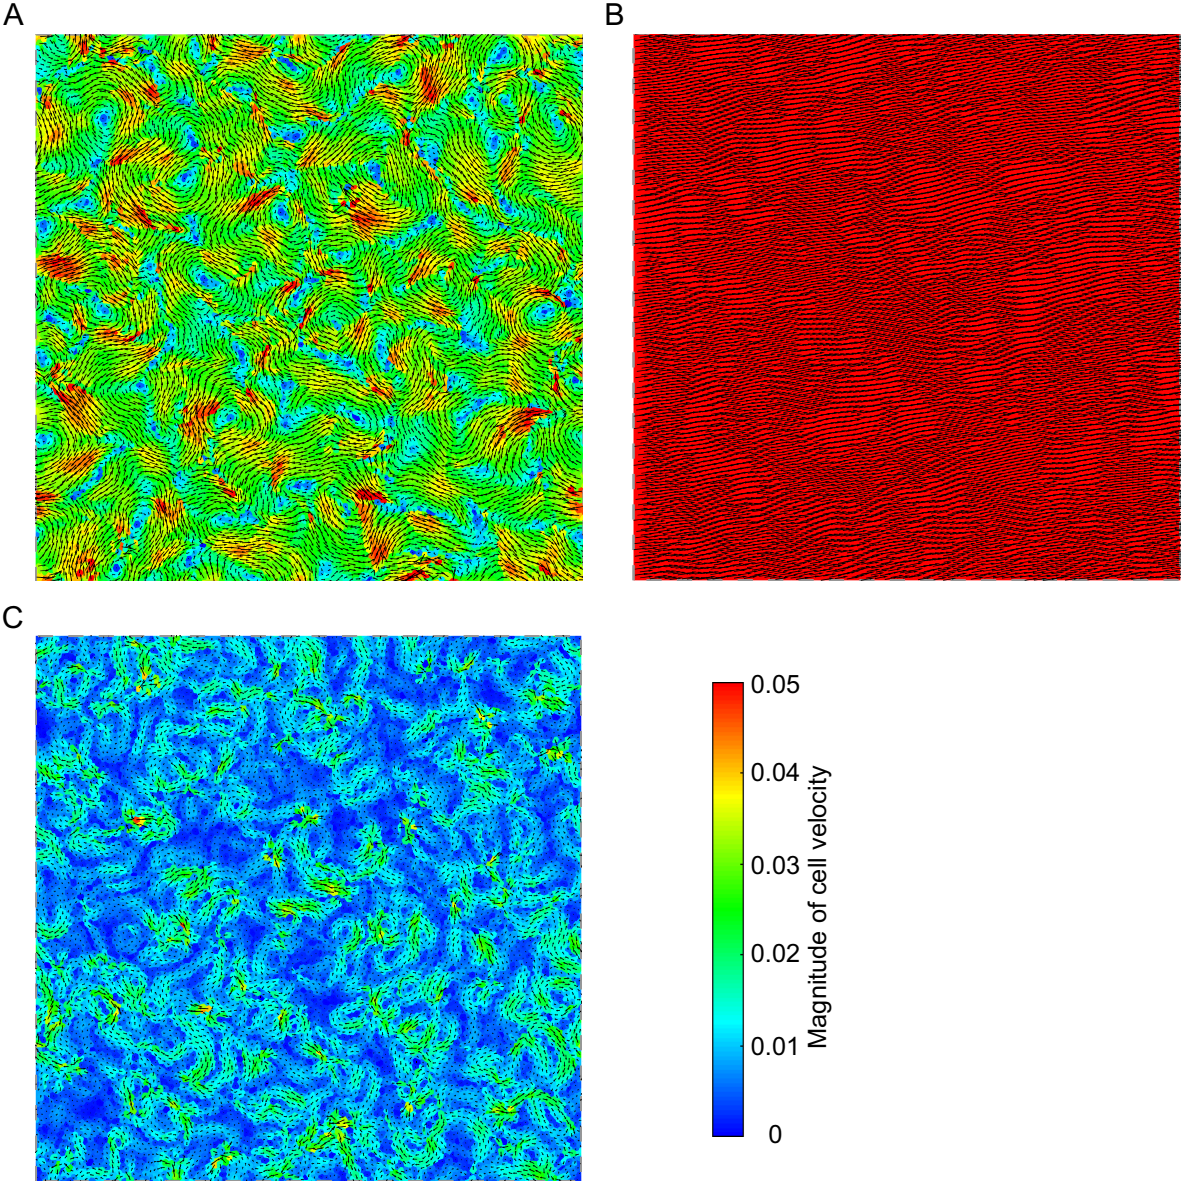

**Fig. S1. Typical velocity fields of collective cell migration obtained from our active vertex model.** The arrows denote velocity vectors of cells and the color code indicates magnitude of cell velocity. Parameters values: (A)  $\mu_a = 0.05$  and  $\mu_c = 1.0$ ; (B)  $\mu_a = 0.1$  and  $\mu_c = 0$ ; and (C)  $\mu_a = 0.0$  and  $\mu_c = 1.0$ .

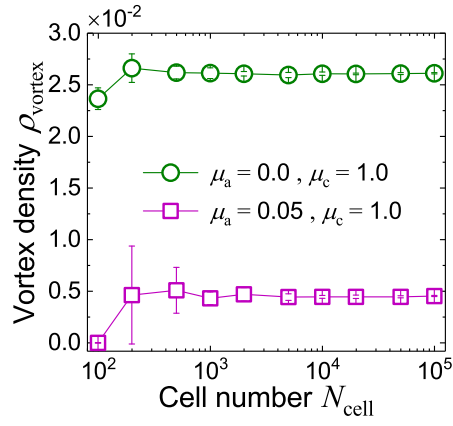

**Fig. S2. Intrinsic vortex density in confluent cell monolayers.** The vortex density  $\rho_{\text{vortex}}$  approaches a constant for large enough system ( $N_{\text{cell}} \rightarrow +\infty$ ). Data are mean  $\pm$  SD.

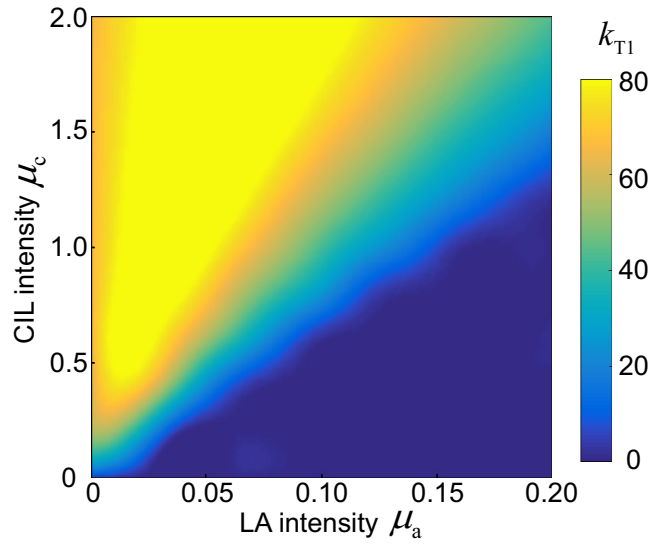

**Fig. S3. The frequency of cell neighbor exchange regulated by intercellular social interactions.** Phase diagrams of the frequency of cell neighbor exchange  $k_{T1}$  under the regulation of LA ( $\mu_a$ ) and CIL ( $\mu_c$ ).

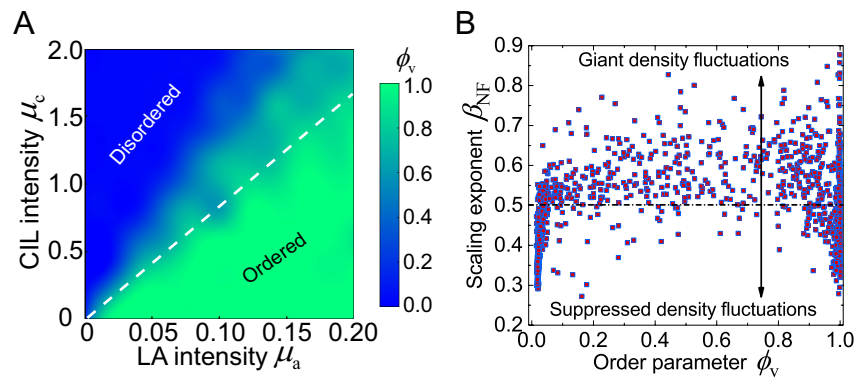

**Fig. S4. Giant density fluctuations in confluent cell monolayers are not restricted to emerge in the highly ordered state of collective motions, but take place in a state with the motion order in a rather broad range.** (A) Phase diagrams of the order parameter  $\phi_v$  regulated by LA ( $\mu_a$ ) and CIL ( $\mu_c$ ). Here, the order parameter is defined as  $\phi_v = \langle |(1/N_{\text{cell}}) \sum_J \mathbf{v}_J / |\mathbf{v}_J| | \rangle_t$ . The ordered phase and disordered phase are distinguished at  $\phi_v = 0.8$ . (B) Scatter diagram of the scaling exponent for number fluctuations  $\beta_{NF}$  versus the motion order  $\phi_v$ .
